# Supplementary material
Source: PubMed Central journal article supplement (PMC3251023)
Supplement: supp_111.183053_JPET183053_supplemental_data.pdf [file supp_111.183053_JPET183053_supplemental_data.pdf]

**Title:** Small molecule positive allosteric modulation of TRPV1 activation by vanilloids and acidic pH

**Authors:** Krisztian Kaszas, Jason M Keller, Claudio Coddou, Santosh Mishra, Mark Hoon, Stanko Stojilkovic, Kenneth A. Jacobson and Michael J. Iadarola

**Journal:** Journal of Pharmacology and Experimental Therapy

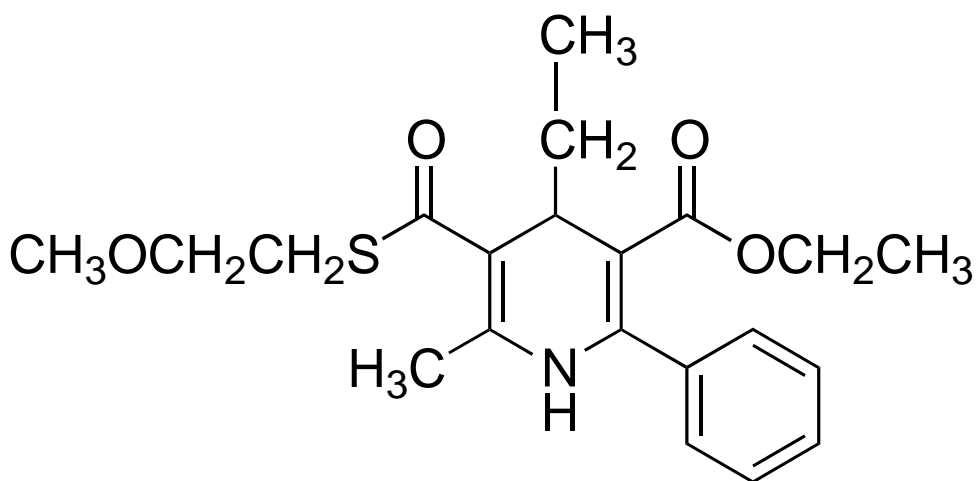

**Supplemental Figure 1. Full name and structure of MRS1477** 4,5-diethyl-3-(2-methoxyethylthio)-2-methyl-6-phenyl-1,4-(±)-dihydropyridine-3,5-dicarboxylate

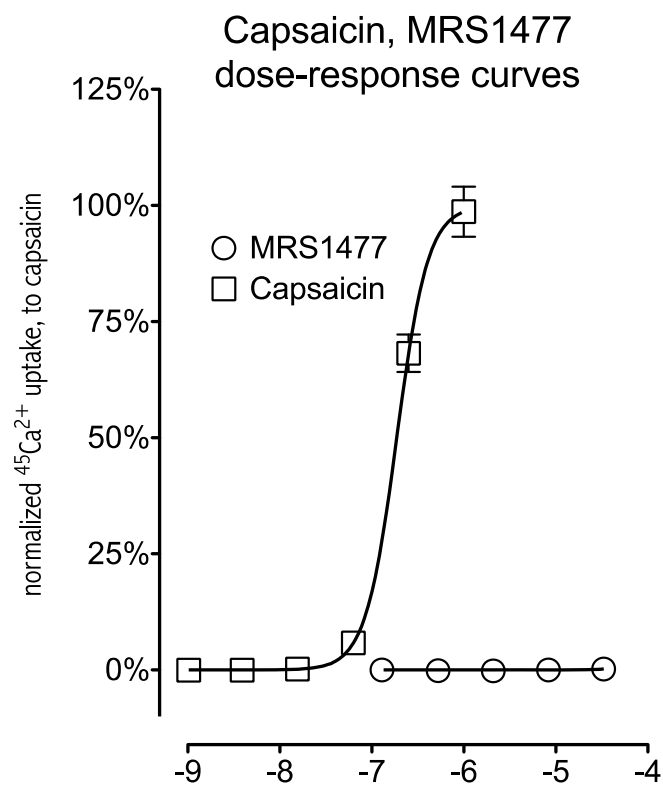

**Supplemental Figure 2:** Dose-response curve of MRS1477 in the absence of any TRPV1 agonist; Capsaicin dose-response curve from the same experiment included for reference.

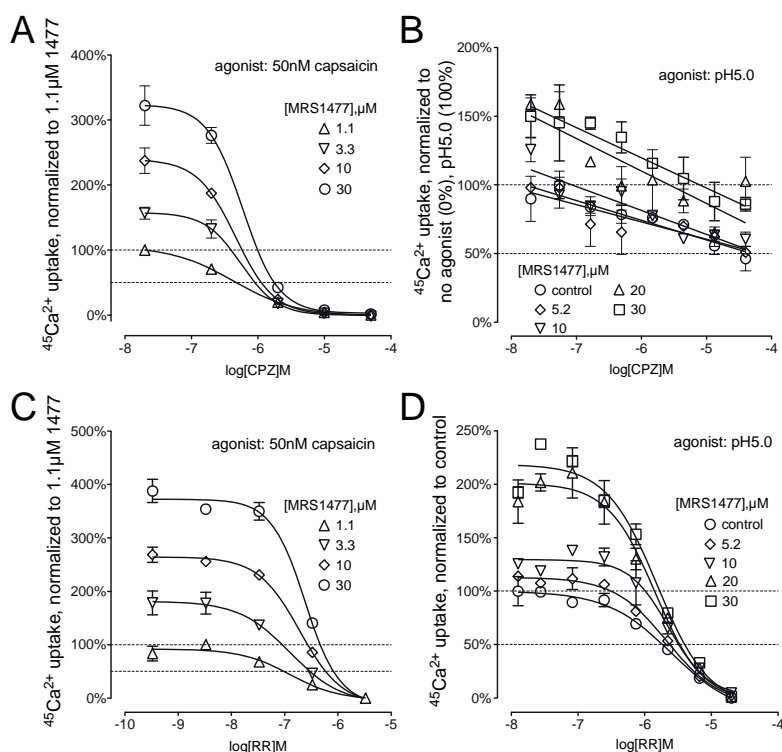

**Supplemental Figure 3: MRS1477 does not affect TRPV1 inhibition by capsazepine or**

**ruthenium red** (A) Increasing concentrations of MRS1477 potentiate activation of TRPV1

by 50nM capsaicin up to three-fold. (B) CPZ is a partial inhibitor of TRPV1 activation by

protons, yielding incomplete D-I curves that show a linear increase in inhibition with

increasing doses of CPZ. (C) RR inhibition of capsaicin-activated TRPV1 in the presence of

increasing amounts of MRS1477 shows a progressive potentiation of TRPV1 response, with

the extent of MRS1477-induced potentiation comparable to what we have previously

observed with CPZ on *panel A*. (D) RR is also an inhibitor of proton activation of TRPV1 but

it does not interfere with potentiation by MRS1477. Curve-fit details are in Supplemental

Table 3.

|                       | EC50,nM | +/-SEM | Hill-Slope | +/-SEM |
|-----------------------|---------|--------|------------|--------|
| pH7.4                 | 133.4   | 7.38   | 1.71       | 0.19   |
| pH7.4 + PMA           | 82.6    | 5.66   | 1.85       | 0.2    |
| pH7.4 + MRS1477       | 87.7    | 3.62   | 1.98       | 0.14   |
| pH7.4 + PMA + MRS1477 | 29.5    | 3.98   | 1.29       | 0.24   |
| pH6.0                 | 31.4    | 4.23   | 1.44       | 0.3    |
| pH6.0 + PMA           | 20.9    | 2.76   | 1.34       | 0.22   |
| pH6.0 + MRS1477       | 18.4    | 2.78   | 1.8        | 0.4    |
| pH6.0 + PMA + MRS1477 | 6.72    | 2.86   | 0.96       | 0.3    |

**Supplemental Table 1:** Detailed curve-fit results for Figure 1G-H. PMA and MRS1477

concentrations were 10 $\mu$ M and 27 $\mu$ M, respectively.

|                           | [MRS1477]<br>$\mu\text{M}$ | Log IC50          | +/-StdErr       | Hill Slope                | +/-StdErr | R <sup>2</sup> |
|---------------------------|----------------------------|-------------------|-----------------|---------------------------|-----------|----------------|
| A - CPZ with<br>50nM Caps | 30                         | -6.217            | 0.068           | -1.609                    | 0.216     | 0.968          |
|                           | 10                         | -6.321            | 0.057           | -1.516                    | 0.189     | 0.975          |
|                           | 3.33                       | -6.235            | 0.070           | -1.590                    | 0.221     | 0.966          |
|                           | 1.11                       | -6.307            | 0.057           | -1.038                    | 0.107     | 0.972          |
| C - RR with<br>50nM Caps  | 30                         | -6.689            | 0.055           | -1.218                    | 0.176     | 0.969          |
|                           | 10                         | -6.781            | 0.047           | -1.132                    | 0.114     | 0.980          |
|                           | 3.33                       | -6.942            | 0.117           | -1.020                    | 0.220     | 0.900          |
|                           | 1.11                       | -7.072            | 0.140           | -0.873                    | 0.208     | 0.850          |
| D - RR with pH5.0         | control                    | -5.770            | 0.053           | -1.104                    | 0.134     | 0.967          |
|                           | 5.2                        | -5.759            | 0.036           | -1.220                    | 0.108     | 0.984          |
|                           | 10                         | -5.716            | 0.063           | -1.337                    | 0.232     | 0.943          |
|                           | 20                         | -5.916            | 0.066           | -1.148                    | 0.177     | 0.950          |
|                           | 30                         | -5.960            | 0.062           | -0.989                    | 0.125     | 0.957          |
| B - CPZ with pH5.0        | [MRS1477]<br>$\mu\text{M}$ | Slope             | Slope 95% CI    | Y-intercept<br>when X=0.0 | F         | P <sub>F</sub> |
|                           | control                    | 0.00 $\pm$ 2.376  | -5.097 to 5.097 | 100.0 $\pm$ 14.64         | 0.0000    | 1.0000         |
|                           | 5.2                        | 2.73 $\pm$ 3.158  | -4.044 to 9.504 | 115.8 $\pm$ 19.45         | 0.7475    | 0.4018         |
|                           | 10                         | -1.04 $\pm$ 4.145 | -9.928 to 7.855 | 102.8 $\pm$ 25.53         | 0.0625    | 0.8062         |
|                           | 20                         | -0.39 $\pm$ 7.565 | -16.62 to 15.83 | 140.2 $\pm$ 46.60         | 0.0027    | 0.9590         |
|                           | 30                         | 0.43 $\pm$ 4.584  | -9.406 to 10.26 | 156.0 $\pm$ 28.24         | 0.0087    | 0.9271         |

**Supplemental Table 2:** Detailed curve-fit results for Figure 5. Results in panel A, C and D were fit using least squares fit “log(inhibitor) vs. normalized response -- Variable slope”. Panel B shows linear regression analysis of the data where F shows how close the slope of the line is to horizontal (horizontal = 0) while P<sub>F</sub> is the probability associated with the regression line not being horizontal ( P<0.05 means line is not horizontal)

|                                | <b>[MRS1477]<br/>μM</b> | Log IC50 | +/-StdErr | Hill Slope | +/-StdErr | R <sup>2</sup> |
|--------------------------------|-------------------------|----------|-----------|------------|-----------|----------------|
| A - CPZ with<br>50nM capsaicin | <b>30</b>               | -6.227   | 0.099     | -1.610     | 0.297     | 0.968          |
|                                | <b>10</b>               | -6.333   | 0.082     | -1.509     | 0.264     | 0.975          |
|                                | <b>3.33</b>             | -6.250   | 0.102     | -1.608     | 0.311     | 0.966          |
|                                | <b>1.11</b>             | -6.361   | 0.097     | -0.919     | 0.168     | 0.974          |
| C - RR with<br>50nM capsaicin  | <b>30</b>               | -6.613   | 0.063     | -1.354     | 0.346     | 0.974          |
|                                | <b>10</b>               | -6.715   | 0.066     | -1.101     | 0.166     | 0.982          |
|                                | <b>3.33</b>             | -6.899   | 0.202     | -0.909     | 0.315     | 0.901          |
|                                | <b>1.11</b>             | -6.904   | 0.233     | -0.954     | 0.388     | 0.863          |
| D - RR with pH5.0 a            | <b>control</b>          | -5.604   | 0.162     | -0.902     | 0.234     | 0.972          |
|                                | <b>5.2</b>              | -5.662   | 0.077     | -1.086     | 0.173     | 0.987          |
|                                | <b>10</b>               | -5.637   | 0.099     | -1.483     | 0.433     | 0.957          |
|                                | <b>20</b>               | -5.842   | 0.115     | -1.216     | 0.352     | 0.955          |
|                                | <b>30</b>               | -5.810   | 0.098     | -1.134     | 0.260     | 0.972          |

**Supplemental Table 3:** Detailed curve-fit results for Supplemental Figure 3. In the case of Panel B, CPZ with pH5.0 as agonists is not included since it was not possible to fit curves to the data. Straight lines were fit to illustrate trend.
